# Supplementary material for: mTORC1 Signaling Pathway Mediated SIRT6 Overexpression in TGF-β1-Induced Pulmonary Fibrosis
Source: Research Square preprint supplement (doi:10.21203/rs.3.rs-1149371/v1), 2021-12-28
Supplement: Supplementary file 1 [file 7534825764d42bcb4acffa82.docx]

Supplementary data


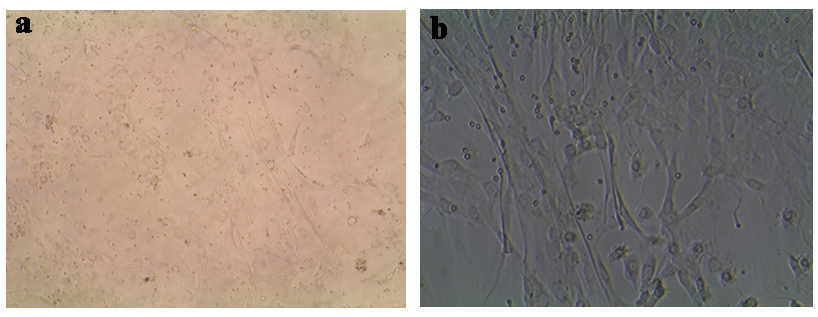


Supplementary Figure 1. Identification of primary human lung fibroblasts. a. The cells isolated from lung tissues of IPF patients. b. The primary human lung fibroblasts were cultured with TGF-β1(20ng/mL).


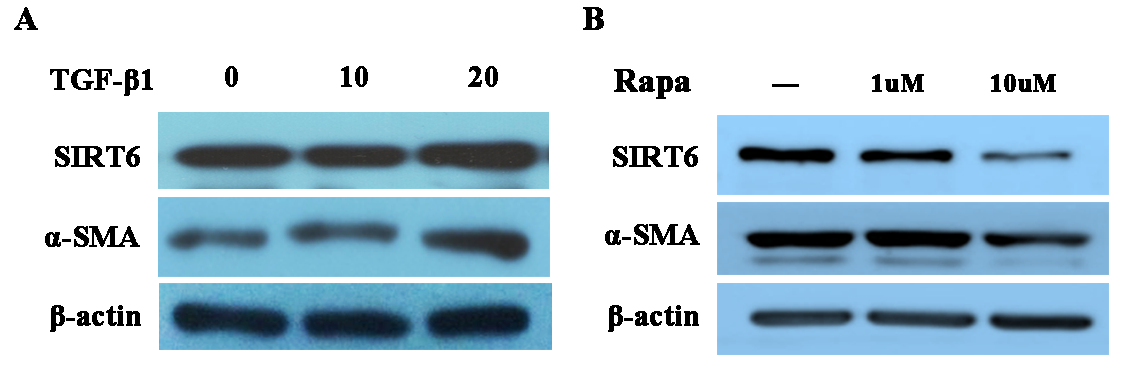


Supplementary Figure 2. MRC5 line was cultured for 48 hours with TGF-β1-induced myofibroblast differentiation in a concentration-dependent manner (0, 10, 20ng/mL). A. Expression of SIRT6 and α-SMA protein induced by TGF-β1 were increased in a concentration-dependent manner. B. Expression of SIRT6 and α-SMA protein were decreased by rapamycin treatment in a concentration-dependent manner (0, 1, 10μM).


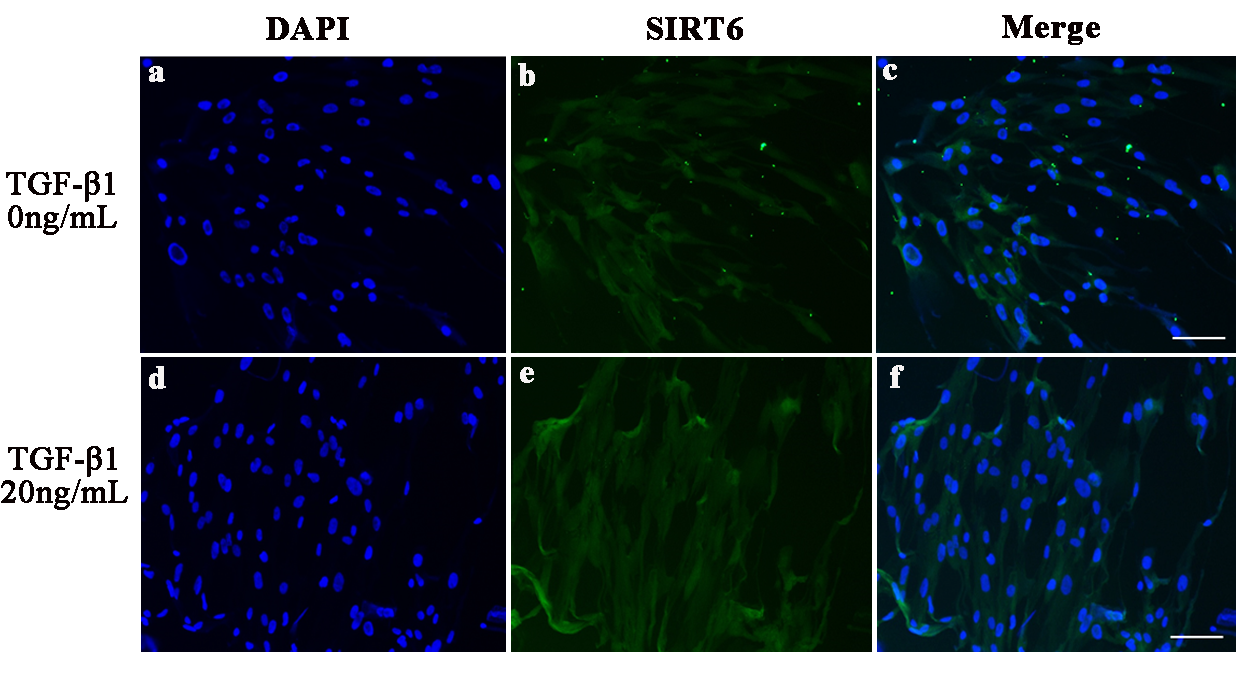


Supplementary Figure 3. MRC5 line was cultured for 48h hours with TGF-β1-induced myofibroblast differentiation in a concentration-dependent manner (0, 20ng/mL). a-c. After treatment with TGF-β1(0 ng/mL), immunofluorescence staining of DAPI (blue) in nucleus of MRC5, SIRT6 (green) was found in MRC5. d-f. Immunofluorescence staining of SIRT6 (green) in MRC5 Nuclei are shown in blue (DAPI staining) with TGF-β1stimulation (20 ng/mL).
